# Supplementary material
Source: PubMed Central journal article supplement (PMC4187689)
Supplement: JB.01801-14_zjb999093326so1.pdf [file JB.01801-14_zjb999093326so1.pdf]

## Supplementary Information

### Supplementary Figure Legends

**Figure S1.** Promoter activities of the single-base substitutions in a BPs lysogen of *M.*

*smegmatis* mc<sup>2</sup>155. (A) The fluorescence of P<sub>R</sub>-mCherry transcriptional fusions with single base substitutions in the extended -10 and -10 motifs (as shown in Fig. 2A) in a BPs lysogen. (B) The fluorescence of P<sub>R</sub>-mCherry transcriptional fusions with single base substitutions in the -35 hexamer (as shown in Fig. 2B) in a BPs lysogen. The wild-type P<sub>R</sub> sequence and most active substitution are included below. N= any base; H= A, C, or T; M= A or C; R= A or G; S= G or C; V= A,C or G

**Figure S2.** Effect of single base pair substitutions in the spacer region on promoter activity and derepression of P<sub>R</sub> in a BPs lysogen. (A) The fluorescence of P<sub>R</sub>-mCherry transcriptional fusions in *M. smegmatis* mc<sup>2</sup>155 and *M. smegmatis* mc<sup>2</sup>155(BPs) containing single base substitutions in the spacer region from -26 to -15. This region is the operator O<sub>R</sub> (coordinates 29484 to 29495), which is the binding site of the BPs repressor, gp33. The bases of O<sub>R</sub> that overlap with the extended -10 motif (E) are noted. (B) The amount of derepression caused by the substitutions from (A) was calculated by taking the reciprocal of the ratio of activity in mc<sup>2</sup>155 to mc<sup>2</sup>155(BPs). The bases from O<sub>R</sub> that overlap with the extended -10 motif are noted (E). ND= not determined

**Figure S3.** Comparative expression of combinatorial mutants in *E. coli*. A subset of the P<sub>R</sub> promoter mutants were assayed for promoter activity in *E. coli*, including a promoterless vector (pLO73), the hsp60 promoter (pLO74), the wild-type P<sub>R</sub> promoter (pLO75) and a number of the combinatorial mutants. The strengths of the combinatorial mutations in mycobacteria are reported in Figures 4, 5 and 6, except for pLO160 (C-16T, C-14G, G-10A, T-9C, C-34A).

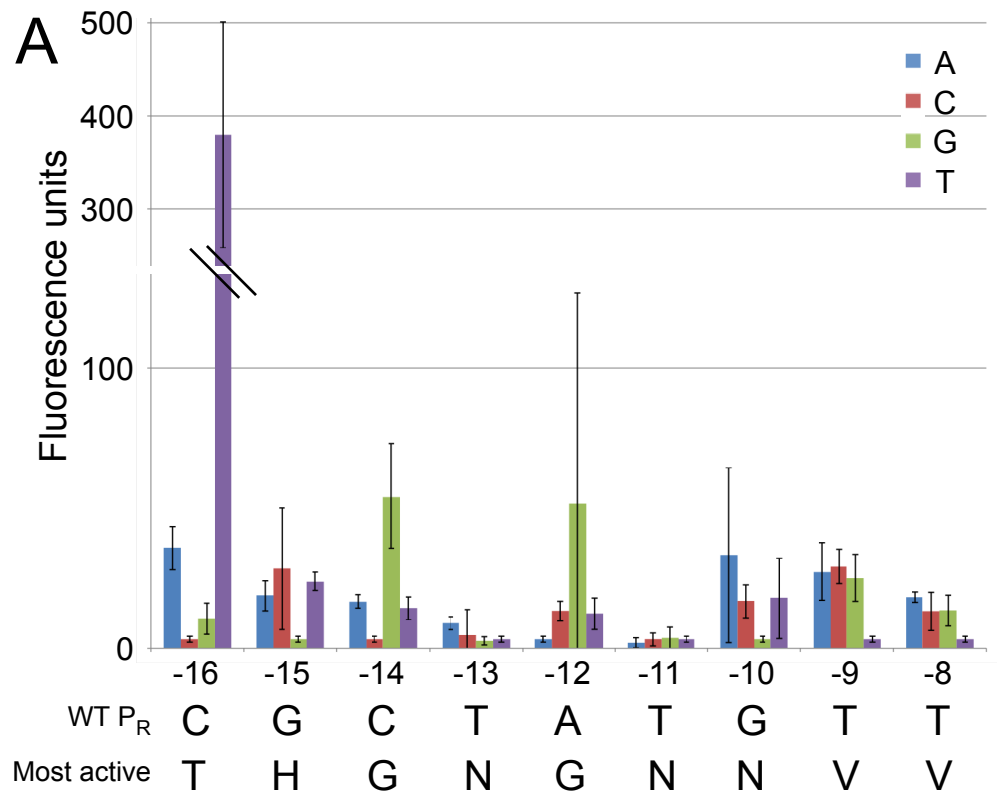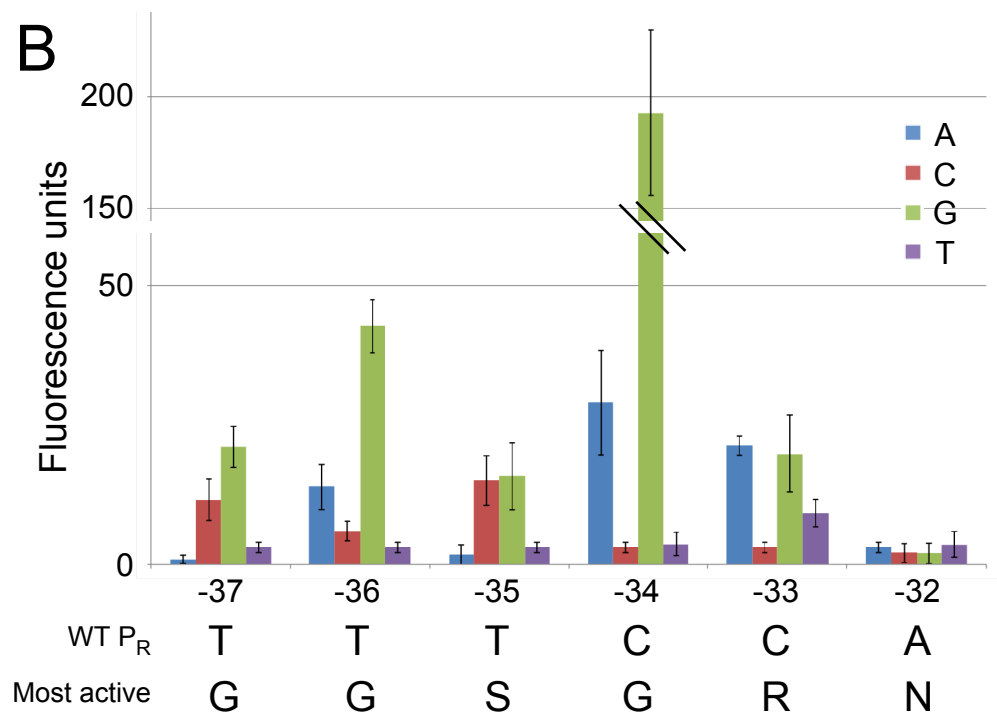

Figure S1

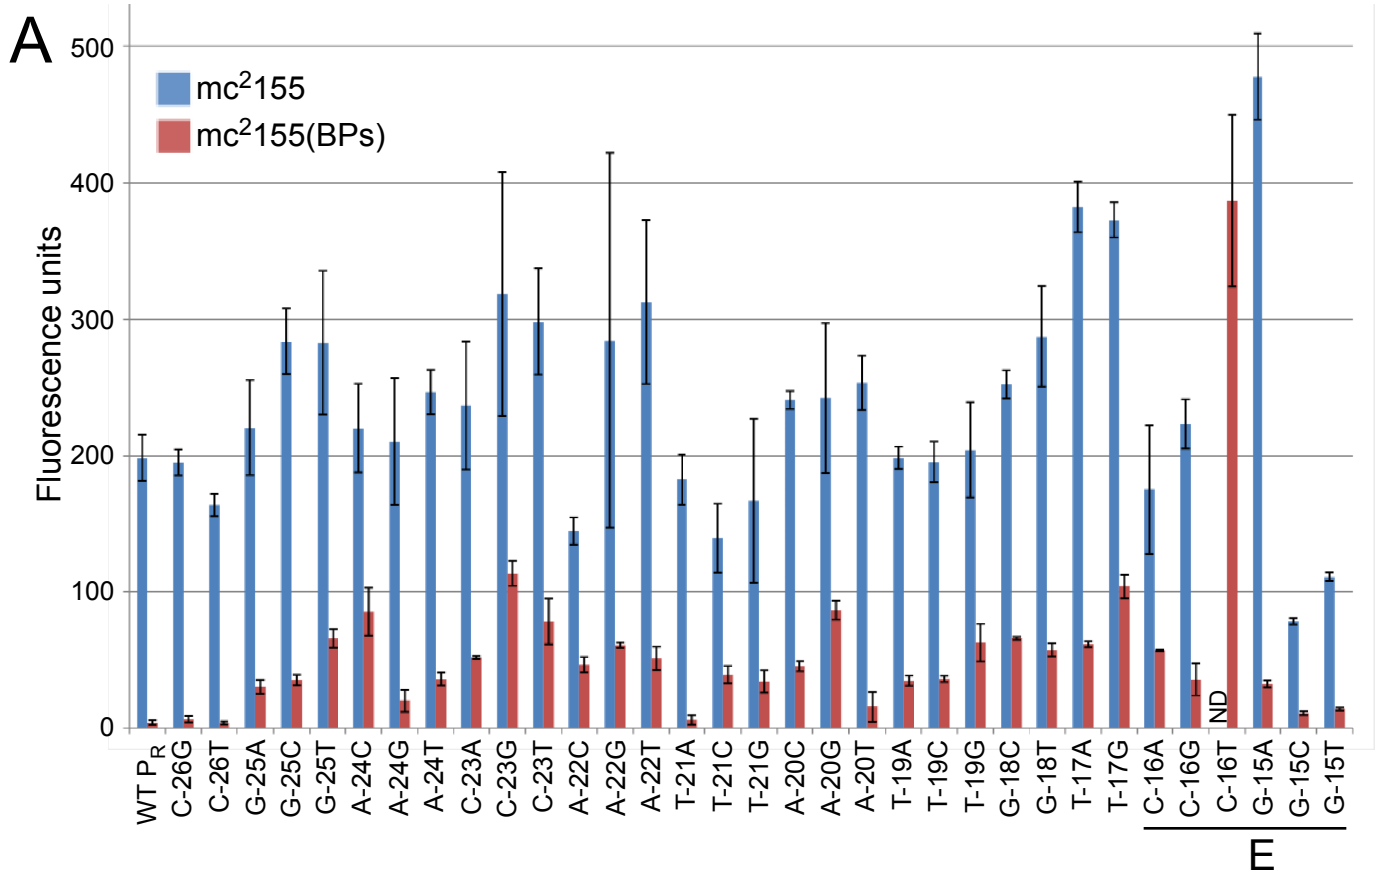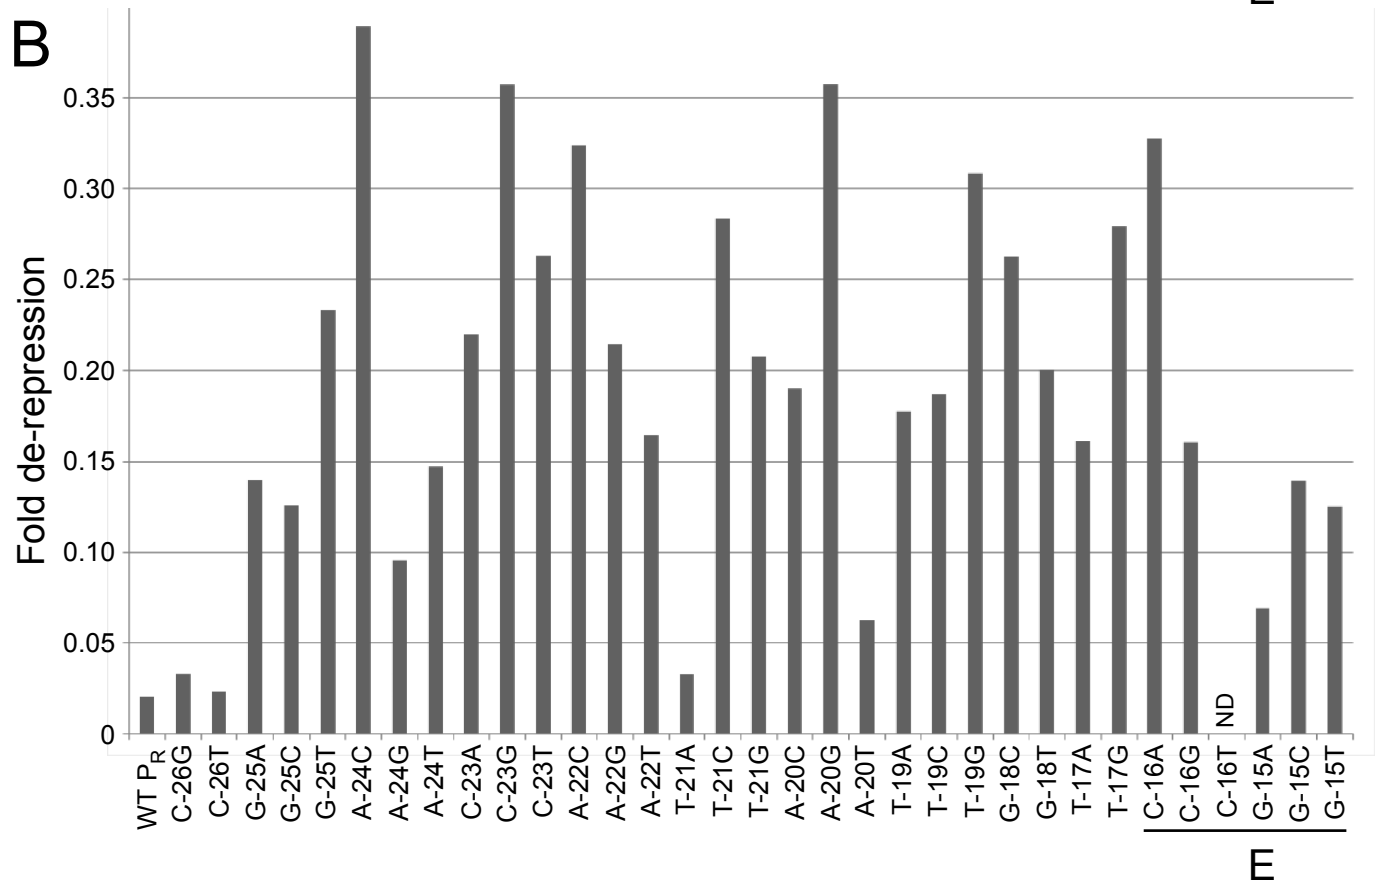

Figure S2

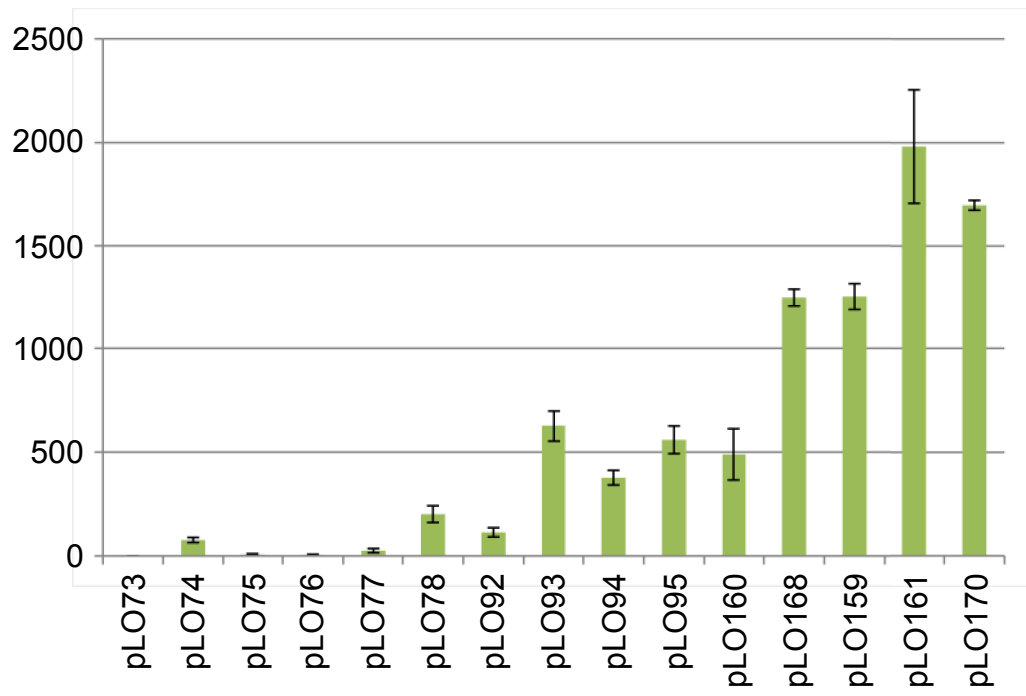

Figure S3

Table S1. Plasmids used in this study.

| Plasmid | Promoter mutations | BPs coordinates | Description                                                                                                                | Reference             |
|---------|--------------------|-----------------|----------------------------------------------------------------------------------------------------------------------------|-----------------------|
| pLO86   | NA                 | NA              | Replicative parental vector with no promoter driving mCherry expression                                                    | Broussard et al. 2013 |
| pLO87   | NA                 | NA              | Replicative parental vector with the hsp60 promoter driving mCherry expression                                             | Broussard et al. 2013 |
| pLO07   | none               | 29224-29598     | Replicative vector with P <sub>R</sub> (genes 33-34 intergenic region, coordinates 29224-29598) driving mCherry expression | Broussard et al. 2013 |
| pLO224  | T-37A              | T29473A         | pLO07 site directed mutant with point mutation T>A at P <sub>R</sub> -37 (BPs coordinate 29473)                            | this study            |
| pLO225  | T-37C              | T29473C         | pLO07 site directed mutant with point mutation T>C at P <sub>R</sub> -37 (BPs coordinate 29473)                            | this study            |
| pLO226  | T-37G              | T29473G         | pLO07 site directed mutant with point mutation T>G at P <sub>R</sub> -37 (BPs coordinate 29473)                            | this study            |
| pLO227  | T-36A              | T29474A         | pLO07 site directed mutant with point mutation T>A at P <sub>R</sub> -36 (BPs coordinate 29474)                            | this study            |
| pLO228  | T-36C              | T29474C         | pLO07 site directed mutant with point mutation T>C at P <sub>R</sub> -36 (BPs coordinate 29474)                            | this study            |
| pLO229  | T-36G              | T29474G         | pLO07 site directed mutant with point mutation T>G at P <sub>R</sub> -36 (BPs coordinate 29474)                            | this study            |
| pLO230  | T-35A              | T29475A         | pLO07 site directed mutant with point mutation T>A at P <sub>R</sub> -35 (BPs coordinate 29475)                            | this study            |
| pLO231  | T-35C              | T29475C         | pLO07 site directed mutant with point mutation T>C at P <sub>R</sub> -35 (BPs coordinate 29475)                            | this study            |
| pLO232  | T-35G              | T29475G         | pLO07 site directed mutant with point mutation T>G at P <sub>R</sub> -35 (BPs coordinate 29475)                            | this study            |
| pLO233  | C-34A              | C29476A         | pLO07 site directed mutant with point mutation C>A at P <sub>R</sub> -34 (BPs coordinate 29476)                            | this study            |
| pLO234  | C-34G              | C29476G         | pLO07 site directed mutant with point mutation C>G at P <sub>R</sub> -34 (BPs coordinate 29476)                            | this study            |
| pLO235  | C-34T              | C29476T         | pLO07 site directed mutant with point mutation C>T at P <sub>R</sub> -34 (BPs coordinate 29476)                            | this study            |
| pLO236  | C-33A              | C29477A         | pLO07 site directed mutant with point mutation C>A at P <sub>R</sub> -33 (BPs coordinate 29477)                            | this study            |
| pLO237  | C-33G              | C29477G         | pLO07 site directed mutant with point mutation C>G at P <sub>R</sub> -33 (BPs coordinate 29477)                            | this study            |

|        |       |         |                                                                                                 |            |
|--------|-------|---------|-------------------------------------------------------------------------------------------------|------------|
| pLO238 | C-33T | C29477T | pLO07 site directed mutant with point mutation C>T at P <sub>R</sub> -33 (BPs coordinate 29477) | this study |
| pLO239 | A-32C | A29478C | pLO07 site directed mutant with point mutation A>C at P <sub>R</sub> -32 (BPs coordinate 29478) | this study |
| pLO240 | A-32G | A29478G | pLO07 site directed mutant with point mutation A>G at P <sub>R</sub> -32 (BPs coordinate 29478) | this study |
| pLO241 | A-32T | A29478T | pLO07 site directed mutant with point mutation A>T at P <sub>R</sub> -32 (BPs coordinate 29478) | this study |
| pLO242 | C-16A | C29494A | pLO07 site directed mutant with point mutation C>A at P <sub>R</sub> -16 (BPs coordinate 29494) | this study |
| pLO243 | C-16G | C29494G | pLO07 site directed mutant with point mutation C>G at P <sub>R</sub> -16 (BPs coordinate 29494) | this study |
| pLO244 | C-16T | C29494T | pLO07 site directed mutant with point mutation C>T at P <sub>R</sub> -16 (BPs coordinate 29494) | this study |
| pLO245 | G-15A | G29495A | pLO07 site directed mutant with point mutation G>A at P <sub>R</sub> -15 (BPs coordinate 29495) | this study |
| pLO246 | G-15C | G29495C | pLO07 site directed mutant with point mutation G>C at P <sub>R</sub> -15 (BPs coordinate 29495) | this study |
| pLO247 | G-15T | G29495T | pLO07 site directed mutant with point mutation G>T at P <sub>R</sub> -15 (BPs coordinate 29495) | this study |
| pLO248 | C-14A | C29496A | pLO07 site directed mutant with point mutation C>A at P <sub>R</sub> -14 (BPs coordinate 29496) | this study |
| pLO249 | C-14G | C29496G | pLO07 site directed mutant with point mutation C>G at P <sub>R</sub> -14 (BPs coordinate 29496) | this study |
| pLO250 | C-14T | C29496T | pLO07 site directed mutant with point mutation C>T at P <sub>R</sub> -14 (BPs coordinate 29496) | this study |
| pLO251 | T-13A | T29497A | pLO07 site directed mutant with point mutation T>A at P <sub>R</sub> -13 (BPs coordinate 29497) | this study |
| pLO252 | T-13C | T29497C | pLO07 site directed mutant with point mutation T>C at P <sub>R</sub> -13 (BPs coordinate 29497) | this study |
| pLO253 | T-13G | T29497G | pLO07 site directed mutant with point mutation T>G at P <sub>R</sub> -13 (BPs coordinate 29497) | this study |
| pLO254 | A-12C | A29498C | pLO07 site directed mutant with point mutation A>C at P <sub>R</sub> -12 (BPs coordinate 29498) | this study |
| pLO255 | A-12G | A29498G | pLO07 site directed mutant with point mutation A>G at P <sub>R</sub> -12 (BPs coordinate 29498) | this study |

|        |                       |                     |                                                                                                                      |                  |
|--------|-----------------------|---------------------|----------------------------------------------------------------------------------------------------------------------|------------------|
| pLO256 | A-12T                 | A29498T             | pLO07 site directed mutant with point mutation A>T at P <sub>R</sub> -12 (BPs coordinate 29498)                      | this study       |
| pLO257 | T-11A                 | T29499A             | pLO07 site directed mutant with point mutation T>A at P <sub>R</sub> -11 (BPs coordinate 29499)                      | this study       |
| pLO258 | T-11C                 | T29499C             | pLO07 site directed mutant with point mutation T>C at P <sub>R</sub> -11 (BPs coordinate 29499)                      | this study       |
| pLO259 | T-11G                 | T29499G             | pLO07 site directed mutant with point mutation T>G at P <sub>R</sub> -11 (BPs coordinate 29499)                      | this study       |
| pLO260 | G-10A                 | G29500A             | pLO07 site directed mutant with point mutation G>A at P <sub>R</sub> -10 (BPs coordinate 29500)                      | this study       |
| pLO261 | G-10C                 | G29500C             | pLO07 site directed mutant with point mutation G>C at P <sub>R</sub> -10 (BPs coordinate 29500)                      | this study       |
| pLO262 | G-10T                 | G29500T             | pLO07 site directed mutant with point mutation G>T at P <sub>R</sub> -10 (BPs coordinate 29500)                      | this study       |
| pLO263 | T-9A                  | T29501A             | pLO07 site directed mutant with point mutation T>A at P <sub>R</sub> -9 (BPs coordinate 29501)                       | this study       |
| pLO264 | T-9C                  | T29501C             | pLO07 site directed mutant with point mutation T>C at P <sub>R</sub> -9 (BPs coordinate 29501)                       | this study       |
| pLO265 | T-9G                  | T29501G             | pLO07 site directed mutant with point mutation T>G at P <sub>R</sub> -9 (BPs coordinate 29501)                       | this study       |
| pLO266 | T-8A                  | T29502A             | pLO07 site directed mutant with point mutation T>A at P <sub>R</sub> -8 (BPs coordinate 29502)                       | this study       |
| pLO267 | T-8C                  | T29502C             | pLO07 site directed mutant with point mutation T>C at P <sub>R</sub> -8 (BPs coordinate 29502)                       | this study       |
| pLO268 | T-8G                  | T29502G             | pLO07 site directed mutant with point mutation T>G at P <sub>R</sub> -8 (BPs coordinate 29502)                       | this study       |
| pLO156 | ΔA-29                 | ΔA29481             | pLO07 site directed mutant with deletion of 1 bp from the P <sub>R</sub> spacer region (BPs coordinate 29481)        | this study       |
| pLO157 | ΔA-29<br>ΔG-28        | ΔA29481<br>ΔG29482  | pLO07 site directed mutant with deletion of 2 bp from the P <sub>R</sub> spacer region (BPs coordinate 29481-29482)  | this study       |
| pLO158 | T at G-28<br>and A-27 | ins29482-<br>29483T | pLO07 site directed mutant with insertion of T in the P <sub>R</sub> spacer region (BPs coordinates 29482 and 29483) | this study       |
| pTTB1b | NA                    | NA                  | Tweety integrative parental vector                                                                                   | Pham et al. 2007 |
| pLO73  | NA                    | NA                  | pTTP1b with promoterless mCherry                                                                                     | this study       |
| pLO74  | NA                    | NA                  | pTTP1b with hsp60 promoter-mCherry                                                                                   | this study       |
| pLO75  | none                  | 29224-29598         | pTTP1b with P <sub>R</sub> -mCherry                                                                                  | this study       |

|       |                                                   |                                                                |                                                                                                                                |            |
|-------|---------------------------------------------------|----------------------------------------------------------------|--------------------------------------------------------------------------------------------------------------------------------|------------|
| pLO76 | C-16T                                             | C29494T                                                        | pTTP1b with P <sub>R</sub> C-16T-mCherry                                                                                       | this study |
| pLO77 | C-16T<br>T-9C                                     | C29494T<br>T29501C                                             | pLO76 site directed mutant with 2 point mutations: C-16T in extended -10 and T-9C in -10                                       | this study |
| pLO78 | C-16T<br>T-9C<br>G-10A                            | C29494T<br>T29501C<br>G29500A                                  | pLO77 site directed mutant with 2 point mutations: C-16T in extended -10 and T-9C, G-10A in -10                                | this study |
| pLO80 | T-35G<br>C-16T                                    | T29475G<br>C29494T                                             | pLO76 site directed mutant with 2 point mutations: C-16T in extended -10 and T-35G in -35                                      | this study |
| pLO81 | T-35G<br>C-34G<br>C-16T                           | T29475G<br>C29476G<br>C29494T                                  | pLO76 site directed mutant with 3 point mutations: C-16T in extended -10 and T-35G, C-34G in -35                               | this study |
| pLO82 | T-37C<br>T-35G<br>C-34G<br>C-16T                  | T29473C<br>T29475G<br>C29476G<br>C29494T                       | pLO76 site directed mutant with 4 point mutations: C-16T in extended -10 and T-35G, C-34G, T-37C in -35                        | this study |
| pLO83 | T-35G<br>C-16T<br>T-9C                            | T29475G<br>C29494T<br>T29501C                                  | pLO77 site directed mutant with 3 point mutations: C-16T in extended -10, T-9C in -10, and T-35G in -35                        | this study |
| pLO84 | T-35G<br>C-34G<br>C-16T<br>T-9C                   | T29475G<br>C29476G<br>C29494T<br>T29501C                       | pLO77 site directed mutant with 4 point mutations: C-16T in extended -10, T-9C in -10, and T-35G, C-34G in -35                 | this study |
| pLO85 | T-37C<br>T-35G<br>C-34G<br>C-16T<br>T-9C          | T29473C<br>T29475G<br>C29476G<br>C29494T<br>T29501C            | pLO77 site directed mutant with 4 point mutations: C-16T in extended -10, T-9C in -10, and T-35G, C-34G, T-37C in -35          | this study |
| pLO92 | C-16T<br>C-14G<br>T-9C<br>G-10A                   | C29494T<br>C29496G<br>T29501C<br>G29500A                       | pLO78 site directed mutant with 3 point mutations: C-16T, C-14G in extended -10 and T-9C, G-10A in -10                         | this study |
| pLO93 | T-35G<br>C-16T<br>C-14G<br>T-9C<br>G-10A          | T29475G<br>C29494T<br>C29496G<br>T29501C<br>G29500A            | pLO83 site directed mutant with 4 point mutations: C-16T, C-14G in extended -10 and T-9C, G-10A in -10 and T-35G in -35        | this study |
| pLO94 | T-35G<br>C-34G<br>C-16T<br>C-14G<br>T-9C<br>G-10A | T29475G<br>C29476G<br>C29494T<br>C29496G<br>T29501C<br>G29500A | pLO84 site directed mutant with 4 point mutations: C-16T, C-14G in extended -10 and T-9C, G-10A in -10 and T-35G, C-34G in -35 | this study |



|        |                                                                     |                                                                                      |                                                                                                                                                                     |            |
|--------|---------------------------------------------------------------------|--------------------------------------------------------------------------------------|---------------------------------------------------------------------------------------------------------------------------------------------------------------------|------------|
| pLO95  | T-37C<br>T-35G<br>C-34G<br>C-16T<br>C-14G<br>T-9C<br>G-10A          | T29473C<br>T29475G<br>C29476G<br>C29494T<br>C29496G<br>T29501C<br>G29500A            | pLO85 site directed mutant with 4 point mutations: C-16T, C-14G in extended -10 and T-9C, G-10A in -10 and T-35G, C-34G, T-37C in -35                               | this study |
| pLO159 | T-35G<br>C-16T<br>C-14G<br>T-9C<br>G-10A<br>ΔG-28                   | T29475G<br>C29494T<br>C29496G<br>T29501C<br>G29500A<br>ΔG29482                       | pLO93 site directed mutant with 4 point mutations: C-16T, C-14G in extended -10 and T-9C, G-10A in -10 and T-35G in -35, and single base deletion in spacer         | this study |
| pLO160 | C-34A<br>C-16T<br>C-14G<br>T-9C<br>G-10A                            | C29476A<br>C29494T<br>C29496G<br>T29501C<br>G29500A                                  | pLO83 site directed mutant with 4 point mutations: C-16T, C-14G in extended -10 and T-9C, G-10A in -10 and C-34A in -35                                             | this study |
| pLO161 | T-35G<br>C-34A<br>C-16T<br>C-14G<br>T-9C<br>G-10A                   | T29475G<br>C29476A<br>C29494T<br>C29496G<br>T29501C<br>G29500A                       | pLO83 site directed mutant with 4 point mutations: C-16T, C-14G in extended -10 and T-9C, G-10A in -10 and T-35G, C-34A in -35                                      | this study |
| pLO162 | T-37C<br>T-36G<br>T-35G<br>C-34A<br>C-16T<br>C-14G<br>T-9C<br>G-10A | T29473C<br>T29474G<br>T29475G<br>C29476A<br>C29494T<br>C29496G<br>T29501C<br>G29500A | pLO83 site directed mutant with 4 point mutations: C-16T, C-14G in extended -10 and T-9C, G-10A in -10 and T-37C, T-36G, T-35G, C-34A in -35                        | this study |
| pLO168 | T-35G<br>C-16T<br>C-14G<br>T-9C<br>G-10A<br>ΔA-29                   | T29475G<br>C29494T<br>C29496G<br>T29501C<br>G29500A<br>ΔA29481                       | pLO93 site directed mutant with 4 point mutations: C-16T, C-14G in extended -10 and T-9C, G-10A in -10 and T-35G in -35, and single base deletion in spacer         | this study |
| pLO170 | T-35G<br>C-34A<br>C-16T<br>C-14G<br>T-9C<br>G-10A<br>ΔA-29          | T29475G<br>C29476G<br>C29494T<br>C29496G<br>T29501C<br>G29500A<br>ΔA29481            | pLO161 site directed mutant with 7 point mutations: C-16T, C-14G in extended -10 and T-9C, G-10A in -10 and T-35G, C-34G in -35, and single base deletion in spacer | this study |
| pLO185 | T-35G<br>C-16T<br>T-9C<br>G-10A                                     | T29475G<br>C29494T<br>T29501C<br>G29500A                                             | pLO78 site directed mutant with 4 point mutations: C-16T in extended -10 and T-9C, G-10A in -10 and T-35G in -35                                                    | this study |

|        |                                                   |                                                                |                                                                                                                                |            |
|--------|---------------------------------------------------|----------------------------------------------------------------|--------------------------------------------------------------------------------------------------------------------------------|------------|
| pLO186 | T-35G<br>C-34G<br>C-16T<br>T-9C<br>G-10A          | T29475G<br>C29476G<br>C29494T<br>T29501C<br>G29500A            | pLO78 site directed mutant with 5 point mutations: C-16T in extended -10 and T-9C, G-10A in -10 and T-35G, C-34G in -35        | this study |
| pLO187 | T-35G<br>C-34G<br>T-37C<br>C-16T<br>T-9C<br>G-10A | T29473C<br>C29475G<br>T29476G<br>C29494T<br>T29501C<br>G29500A | pLO78 site directed mutant with 6 point mutations: C-16T in extended -10 and T-9C, G-10A in -10 and T-35G, C-34G, T-37G in -35 | this study |
| pLO269 | C-26G                                             | C29484G                                                        | pLO07 site directed mutant with point mutation C>G at O <sub>R</sub> -26 (BPs coordinate 29484)                                | this study |
| pLO270 | C-26T                                             | C29484T                                                        | pLO07 site directed mutant with point mutation C>T at O <sub>R</sub> -26 (BPs coordinate 29484)                                | this study |
| pLO271 | G-25A                                             | G29485A                                                        | pLO07 site directed mutant with point mutation G>A at O <sub>R</sub> -25 (BPs coordinate 29485)                                | this study |
| pLO272 | G-25C                                             | G29485C                                                        | pLO07 site directed mutant with point mutation G>C at O <sub>R</sub> -25 (BPs coordinate 29485)                                | this study |
| pLO273 | G-25T                                             | G29485T                                                        | pLO07 site directed mutant with point mutation G>T at O <sub>R</sub> -25 (BPs coordinate 29485)                                | this study |
| pLO274 | A-24C                                             | A29486C                                                        | pLO07 site directed mutant with point mutation A>C at O <sub>R</sub> -24 (BPs coordinate 29486)                                | this study |
| pLO275 | A-24G                                             | A29486G                                                        | pLO07 site directed mutant with point mutation A>G at O <sub>R</sub> -24 (BPs coordinate 29486)                                | this study |
| pLO276 | A-24T                                             | A29486T                                                        | pLO07 site directed mutant with point mutation A>T at O <sub>R</sub> -24 (BPs coordinate 29486)                                | this study |
| pLO277 | C-23A                                             | C29487A                                                        | pLO07 site directed mutant with point mutation C>A at O <sub>R</sub> -23 (BPs coordinate 29487)                                | this study |
| pLO278 | C-23G                                             | C29487G                                                        | pLO07 site directed mutant with point mutation C>G at O <sub>R</sub> -23 (BPs coordinate 29487)                                | this study |
| pLO279 | C-23T                                             | C29487T                                                        | pLO07 site directed mutant with point mutation C>T at O <sub>R</sub> -23 (BPs coordinate 29487)                                | this study |
| pLO280 | A-22C                                             | A29488C                                                        | pLO07 site directed mutant with point mutation A>C at O <sub>R</sub> -22 (BPs coordinate 29488)                                | this study |
| pLO281 | A-22G                                             | A29488G                                                        | pLO07 site directed mutant with point mutation A>G at O <sub>R</sub> -22 (BPs coordinate 29488)                                | this study |
| pLO282 | A-22T                                             | A29488T                                                        | pLO07 site directed mutant with point mutation A>T at O <sub>R</sub> -22 (BPs coordinate 29488)                                | this study |

|        |       |         |                                                                                                 |            |
|--------|-------|---------|-------------------------------------------------------------------------------------------------|------------|
| pLO283 | T-21A | T29489A | pLO07 site directed mutant with point mutation T>A at O <sub>R</sub> -21 (BPs coordinate 29489) | this study |
| pLO284 | T-21C | T29489C | pLO07 site directed mutant with point mutation T>C at O <sub>R</sub> -21 (BPs coordinate 29489) | this study |
| pLO285 | T-21G | T29489G | pLO07 site directed mutant with point mutation T>G at O <sub>R</sub> -21 (BPs coordinate 29489) | this study |
| pLO286 | A-20C | A29490C | pLO07 site directed mutant with point mutation A>C at O <sub>R</sub> -20 (BPs coordinate 29490) | this study |
| pLO287 | A-20G | A29490G | pLO07 site directed mutant with point mutation A>G at O <sub>R</sub> -20 (BPs coordinate 29490) | this study |
| pLO289 | A-20T | A29490T | pLO07 site directed mutant with point mutation A>T at O <sub>R</sub> -20 (BPs coordinate 29490) | this study |
| pLO290 | T-19A | T29491A | pLO07 site directed mutant with point mutation T>A at O <sub>R</sub> -19 (BPs coordinate 29491) | this study |
| pLO291 | T-19C | T29491C | pLO07 site directed mutant with point mutation T>C at O <sub>R</sub> -19 (BPs coordinate 29491) | this study |
| pLO291 | T-19G | T29491G | pLO07 site directed mutant with point mutation T>G at O <sub>R</sub> -19 (BPs coordinate 29491) | this study |
| pLO292 | G-18C | G29492C | pLO07 site directed mutant with point mutation G>C at O <sub>R</sub> -18 (BPs coordinate 29492) | this study |
| pLO293 | G-18T | G29492T | pLO07 site directed mutant with point mutation G>T at O <sub>R</sub> -18 (BPs coordinate 29492) | this study |
| pLO294 | T-17A | T29493A | pLO07 site directed mutant with point mutation T>A at O <sub>R</sub> -18 (BPs coordinate 29493) | this study |
| pLO295 | T-17G | T29493A | pLO07 site directed mutant with point mutation T>G at O <sub>R</sub> -18 (BPs coordinate 29493) | this study |

---

Table S2. Primers used in this study.

| Primer | Sequence                                      | Description                                                  |
|--------|-----------------------------------------------|--------------------------------------------------------------|
| LMO51  | GCCATGCCTGTCTCGTTGCGTG                        | F for sequencing of pLO86 and pLO07 derivatives              |
| LMO52  | GGAAGCTCAGCTTCAGGTAGTCG                       | R for sequencing of pLO86 and pLO07 derivatives              |
| LMO92  | GCATTTTCCAATAGACGACACATG<br>TCGCTATGTTGGTGCAC | SDM for O <sub>R</sub> spacer T-21C (T29489C)                |
| LMO94  | GCATTTTCCAATAGACGACAVATG<br>TCGCTATGTTGGTGCAC | SDM for O <sub>R</sub> spacer T-21V (T29489V)                |
| LMO96  | GGCGCATTTTCCAATAGACGBCA<br>TATGTCGCTATGTTGGTG | SDM for O <sub>R</sub> spacer A-24B (A29486B)                |
| LMO100 | GTGGCGCATTTTCCAATAGADGA<br>CATATGTCGCTATGTTG  | SDM for O <sub>R</sub> spacer C-26D (C29484D)                |
| LMO102 | GGCGCATTTTCCAATAGACHACAT<br>ATGTCGCTATGTTGGT  | SDM for O <sub>R</sub> spacer G-25H (G29485H)                |
| LMO104 | CGCATTTTCCAATAGACGADATAT<br>GTCGCTATGTTGGTGC  | SDM for O <sub>R</sub> spacer C-23D (C29487D)                |
| LMO106 | CGCATTTTCCAATAGACGACBTAT<br>GTCGCTATGTTGGTGC  | SDM for O <sub>R</sub> spacer A-22B (A29488B)                |
| LMO108 | CATTTTCCAATAGACGACATBTGT<br>CGCTATGTTGGTGCAC  | SDM for O <sub>R</sub> spacer A-20B (A29490B)                |
| LMO110 | ATTTTCCAATAGACGACATAVGTG<br>GCTATGTTGGTGCACA  | SDM for O <sub>R</sub> spacer T-19V (T29491V)                |
| LMO112 | TTTCCAATAGACGACATATHTCGC<br>TATGTTGGTGCACATG  | SDM for O <sub>R</sub> spacer G-18H (G29492H)                |
| LMO114 | TTTCCAATAGACGACATATGVCGC<br>TATGTTGGTGCACATG  | SDM for O <sub>R</sub> spacer T-17V (T29493V)                |
| LMO116 | TCCAATAGACGACATATGTDGCTA<br>TGTTGGTGCACATGAC  | SDM for P <sub>R</sub> extended -10 promoter C-16D (C29494D) |
| LMO118 | CCAATAGACGACATATGTCHCTAT<br>GTTGGTGCACATGACC  | SDM for P <sub>R</sub> extended -10 promoter G-15H (G29495H) |
| LMO126 | CAATAGACGACATATGTCGDTATG<br>TTGGTGCACATGACCC  | SDM for P <sub>R</sub> extended -10 promoter C-14D (C29496D) |
| LMO128 | CCAATAGACGACATATGTCGCVAT<br>GTTGGTGCACATGACC  | SDM for P <sub>R</sub> -10 promoter T-13V (T29497V)          |
| LMO130 | CAATAGACGACATATGTCGCTBTG<br>TTGGTGCACATGACC   | SDM for P <sub>R</sub> -10 promoter A-12B (A29498B)          |
| LMO132 | CCAATAGACGACATATGTCGCTAV<br>GTTGGTGCACATGACC  | SDM for P <sub>R</sub> -10 promoter T-11V (T29499V)          |
| LMO134 | GACGACATATGTCGCTATHTTGGT<br>GCACATGACCCCAAC   | SDM for P <sub>R</sub> -10 promoter G-10H (G29500H)          |
| LMO136 | GACGACATATGTCGCTATGVTGG<br>TGCACATGACCCCAAC   | SDM for P <sub>R</sub> -10 promoter T-9V (T29501V)           |
| LMO138 | ACGACATATGTCGCTATGTVGGT<br>GCACATGACCCCAAC    | SDM for P <sub>R</sub> -10 promoter T-8V (T29502V)           |
| LMO142 | CAATAGACGACATATGTCGGTAT<br>GTTGGTGCACATGACCC  | SDM for P <sub>R</sub> extended -10 promoter C-14G (C29496G) |
| LMO144 | CCAATAGACGACATATGTCGCCA<br>TGTTGGTGCACATGACC  | SDM for P <sub>R</sub> -10 promoter T-13C (T29497C)          |
| LMO146 | CAATAGACGACATATGTCGCTGT<br>GTTGGTGCACATGACC   | SDM for P <sub>R</sub> -10 promoter A-12G (A29498G)          |
| LMO148 | GACGACATATGTCGCTATATTGGT<br>GCACATGACCCCAAC   | SDM for P <sub>R</sub> -10 promoter G-10A (G29500A)          |
| LMO150 | GACGACATATGTCGCTATGCTGG<br>TGCACATGACCCCAAC   | SDM for P <sub>R</sub> -10 promoter T-9C (T29501C)           |
| LMO152 | ACGACATATGTCGCTATGTCGGT<br>GCACATGACCCCAAC    | SDM for P <sub>R</sub> -10 promoter T-8C (T29502C)           |
| LMO174 | CGGGCGTGGCGCATVTTCCAATA<br>GACGAC             | SDM for P <sub>R</sub> -35 promoter T-37V (T29473V)          |
| LMO175 | CGGGCGTGGCGCATTVTCCAATA<br>GACGAC             | SDM for P <sub>R</sub> -35 promoter T-36V (T29474V)          |
| LMO176 | CGGGCGTGGCGCATTTVCCAATA                       | SDM for P <sub>R</sub> -35 promoter T-35V (T29475V)          |

|        |                                             |                                                                                                             |
|--------|---------------------------------------------|-------------------------------------------------------------------------------------------------------------|
|        | GACGAC                                      |                                                                                                             |
| LMO177 | CGGGCGTGGCGCATTTTDCAATA<br>GACGACATATG      | SDM for P <sub>R</sub> -35 promoter C-34D (C29476D)                                                         |
| LMO178 | CGGGCGTGGCGCATTTTDCAATA<br>GACGACATATG      | SDM for P <sub>R</sub> -35 promoter C-33D (C29477D)                                                         |
| LMO179 | CGGGCGTGGCGCATTTTCCBATA<br>GACGACATATG      | SDM for P <sub>R</sub> -35 promoter A-32B (A29478B)                                                         |
| LMO187 | CGGGCGTGGCGCATATTCCAATA<br>GACGAC           | SDM for P <sub>R</sub> -35 promoter T-37A (T29473A)                                                         |
| LMO340 | CGGGCGTGGCGCATTTCCAATA<br>GACGAC            | SDM for P <sub>R</sub> -35 promoter T-35C (T29475C)                                                         |
| LMO350 | TTTTTTCTAGAGCTTGTGGTGGCA<br>TCCGTGG         | F to amplify promoter-mCherry and add XbaI sites                                                            |
| LMO351 | TTTTTTCTAGACGTCAGGTGGCTA<br>GCTGATCAC       | R to amplify promoter-mCherry and add XbaI sites                                                            |
| LMO354 | GCTATTACGCCAGCTGGCGAAAG                     | F for sequencing of pTTP1b derivatives                                                                      |
| LMO355 | GCGAGTGTGGATGCGCAGCG                        | R for sequencing of pTTP1b derivatives                                                                      |
| LMO358 | GACGACATATGTTGCTATGCTGGT<br>GCACATGACCCCAAC | SDM for P <sub>R</sub> -10 combination of C-16T and T-9C                                                    |
| LMO359 | GACGACATATGTTGCTATACTGGT<br>GCACATGACCCCAAC | SDM for P <sub>R</sub> -10 combination of C-16T, T-9C and G-10A                                             |
| LMO360 | CGGGCGTGGCGCATTTGCCAATA<br>GACGAC           | SDM for P <sub>R</sub> -35 T-35G                                                                            |
| LMO361 | CGGGCGTGGCGCATTGGCAATA<br>GACGACATATG       | SDM for P <sub>R</sub> -35 combination T-35G and C-34G                                                      |
| LMO362 | CGGGCGTGGCGCATCTGGCAATA<br>GACGAC           | SDM for P <sub>R</sub> -35 combination T-35G, C-34G and T-37C                                               |
| LMO369 | GACGACATATGTTGGTATACTGGT<br>GCACATGACCCCAAC | SDM for P <sub>R</sub> -10 combination of C-16T, T-9C, G-10A, and C-14G                                     |
| LMO449 | TGGCGCATTTTCCAATGACGACAT<br>ATGTCGCTA       | SDM for 1bp spacer deletion in P <sub>R</sub> ΔA-29 with wild-type P <sub>R</sub> -35                       |
| LMO450 | TGGCGCATTTTCCAATACGACATA<br>TGTCGCTA        | SDM for 2bp spacer deletion in P <sub>R</sub> ΔA-29 and ΔG-28 with wild-type P <sub>R</sub> -35             |
| LMO451 | TGGCGCATTTTCCAATAGTACGAC<br>ATATGTCGCTA     | SDM for 1bp spacer insertion of T in P <sub>R</sub> between G-28 and A-27 with wild-type P <sub>R</sub> -35 |
| LMO452 | TGGCGCATTTGCCAATAACGACA<br>TATGTTGGTA       | SDM for 1bp spacer deletion in P <sub>R</sub> ΔG-28                                                         |
| LMO454 | CGGGCGTGGCGCATTGACAATA<br>GACGACATATG       | SDM for P <sub>R</sub> -35 combination T-35G and C-34A                                                      |
| LMO455 | CGGGCGTGGCGCATGGGACAAT<br>AGACGACATATG      | SDM for P <sub>R</sub> -35 combination T-37C, T-36G, T-35G and C-34A                                        |
| LMO464 | TGGCGCATTTGCCAATGACGACA<br>TATGTTGGTA       | SDM for 1bp spacer deletion in P <sub>R</sub> ΔA-29 with T-35G P <sub>R</sub> -35                           |
| LMO466 | TGGCGCATTTGACAATGACGACA<br>TATGTTGGTA       | SDM for 1bp spacer deletion in P <sub>R</sub> ΔA-29 with T-35G, C-34A P <sub>R</sub> -35                    |
